# Supplementary material for: Optimal schedule of bacillus calmette-guerin for non-muscle-invasive bladder cancer: a meta-analysis of comparative studies
Source: PubMed Central journal article supplement (PMC3722001; doi:10.1186/1471-2407-13-332), 2013-07-05

Table S1 Side effects of various BCG therapy schedules and doses

|                                                                   | Bladder Contracture |          | Epid/Prost/Ure Inf |          | Hematuria |          | LUTS  |          | Fever/Chills/Flu symptoms |          |
|-------------------------------------------------------------------|---------------------|----------|--------------------|----------|-----------|----------|-------|----------|---------------------------|----------|
|                                                                   | Case*               | Control* | Case*              | Control* | Case*     | Control* | Case* | Control* | Case*                     | Control* |
| BCG maintenance vs. Induction (Case vs. Control)                  |                     |          |                    |          |           |          |       |          |                           |          |
| Hinotsu 2011                                                      |                     |          | 1/42               | 0/42     | 39/42     | 30/42    | 39/42 | 30/42    | 18/42                     | 11/42    |
| Decobert 2008                                                     |                     |          |                    |          | 17/31     | 7/40     | 17/31 | 7/40     | 7/31                      | 2/40     |
| Low-dose vs. Standard-dose BCG                                    |                     |          |                    |          |           |          |       |          |                           |          |
| Yalcinkaya 1998                                                   |                     |          | 1/25               | 2/25     | 14/25     | 6/25     | 19/25 | 24/25    | 10/25                     | 12/25    |
| Yoneyama 2008                                                     |                     |          |                    |          | 9/65      | 21/85    | 31/65 | 48/85    | 12/65                     | 20/85    |
| Irie 2003                                                         |                     |          |                    |          | 3/34      | 7/30     | 10/37 | 20/38    | 2/35                      | 5/39     |
| BCG plus Epirubicin vs. BCG alone (Case vs. Control)              |                     |          |                    |          |           |          |       |          |                           |          |
| Bilen 2000                                                        | 1/20                | 0/21     |                    |          | 4/20      | 8/21     | 7/20  | 9/21     | 2/20                      | 3/21     |
| Tozawa 2001                                                       | 0/24                | 2/50     |                    |          |           |          | 13/24 | 20/50    | 5/24                      | 7/50     |
| BCG plus Interferon $\alpha$ -2b vs. BCG alone (Case vs. Control) |                     |          |                    |          |           |          |       |          |                           |          |
| Nepple 2010                                                       |                     |          |                    |          |           |          |       |          | 38/346                    | 16/324   |

BCG, bacillus Calmette-Guérin; CI, confidence interval; Est Rate, estimated occurrence rate; Epid, epididymitis; Ure Inf, Urethral Infections; G/P, Number of group/Number of patients; Induct, induction; LUTS, lower urinary tract symptoms; Maint, maintenance; MMC, mitomycin C; Prost, prostatitis; TURBT, transurethral resection of bladder tumor

\* Event / Total numbers

Table S2 Quality assessment for RCTs using Jadad (5-point)

| Studies                                        | Randomization | Double blinding | Withdrawals and Dropouts | Total Score |
|------------------------------------------------|---------------|-----------------|--------------------------|-------------|
| Maintenance vs. Induction                      |               |                 |                          |             |
| Badalament 1987                                | +             | -               | +                        | 2           |
| Koga 2010                                      | +             | -               | +                        | 2           |
| Hinotsu 2011                                   | +             | -               | +                        | 2           |
| Lamm 2000                                      | ++            | -               | +                        | 3           |
| Palou 2001                                     | +             | -               | +                        | 2           |
| Hudson 1987                                    | ++            | -               | +                        | 3           |
| Low-dose vs. Standard-dose                     |               |                 |                          |             |
| Ojea 2007                                      | +             | -               | +                        | 2           |
| Yalcinkaya 1998                                | +             | -               | -                        | 1           |
| Kumar 2002                                     | +             | +               | +                        | 3           |
| Oddens 2013                                    | +             | -               | +                        | 2           |
| BCG plus Mitomycin C vs. BCG                   |               |                 |                          |             |
| Kaasinen 2003                                  | +             | -               | +                        | 2           |
| Stasi 2006                                     | ++            | -               | +                        | 3           |
| Oosterlinck 2011                               | +             | -               | +                        | 2           |
| Gulpinar 2012                                  | +             | -               | -                        | 1           |
| El Mohsen 2010                                 | +             | -               | -                        | 1           |
| BCG plus Mitomycin C vs. Mitomycin C alone     |               |                 |                          |             |
| Rintala 1996                                   | +             | -               | -                        | 1           |
| Jarvinen 2012                                  | +             | -               | -                        | 1           |
| Witjes 1998                                    | +             | -               | -                        | 1           |
| BCG plus Epirubicin vs. BCG alone              |               |                 |                          |             |
| Cai 2008                                       | ++            | ++              | +                        | 5           |
| Bilen 2000                                     | +             | -               | -                        | 1           |
| BCG plus Interferon $\alpha$ -2b vs. BCG alone |               |                 |                          |             |
| Nepple 2010                                    | ++            | -               | -                        | 2           |

Table S3 Quality assessment for retrospective study using Newcastle-Ottawa Scale

| Studies                                        | Selection | Comparability | Outcome/exposure | Total Score |
|------------------------------------------------|-----------|---------------|------------------|-------------|
| Maintenance vs. Induction                      |           |               |                  |             |
| Andius 2004                                    | ★★★★      |               | ★★★              | 7           |
| Okamura 2011                                   | ★★★★      | ★★            | ★★★              | 9           |
| Decobert 2008                                  | ★★★★      | ★★            | ★★★              | 9           |
| Low-dose vs. Standard-dose                     |           |               |                  |             |
| Takashi 1995                                   | ★★★★      | ★★            | ★★★              | 9           |
| Yoneyama 2008                                  | ★★★★      | ★★            | ★★★              | 9           |
| Irie 2003                                      | ★★★★      | ★★            | ★★★              | 9           |
| BCG plus mitomycin C vs. BCG                   |           |               |                  |             |
| Badalato 2011                                  | ★★★★      | ★             | ★★★              | 8           |
| BCG plus Epirubicin vs. BCG alone              |           |               |                  |             |
| Tozawa 2001                                    | ★★★★      | ★★            | ★★★              | 9           |
| BCG plus Interferon $\alpha$ -2b vs. BCG alone |           |               |                  |             |
| Bazarbashi 2000                                | ★         | ★             | ★                | 3           |

Fig. S1 Summary of cessation-free survival for combination of BCG and Mitomycin C (A, BCG plus Mitomycin C vs. BCG alone; B, BCG plus Mitomycin C vs. Mitomycin C alone)

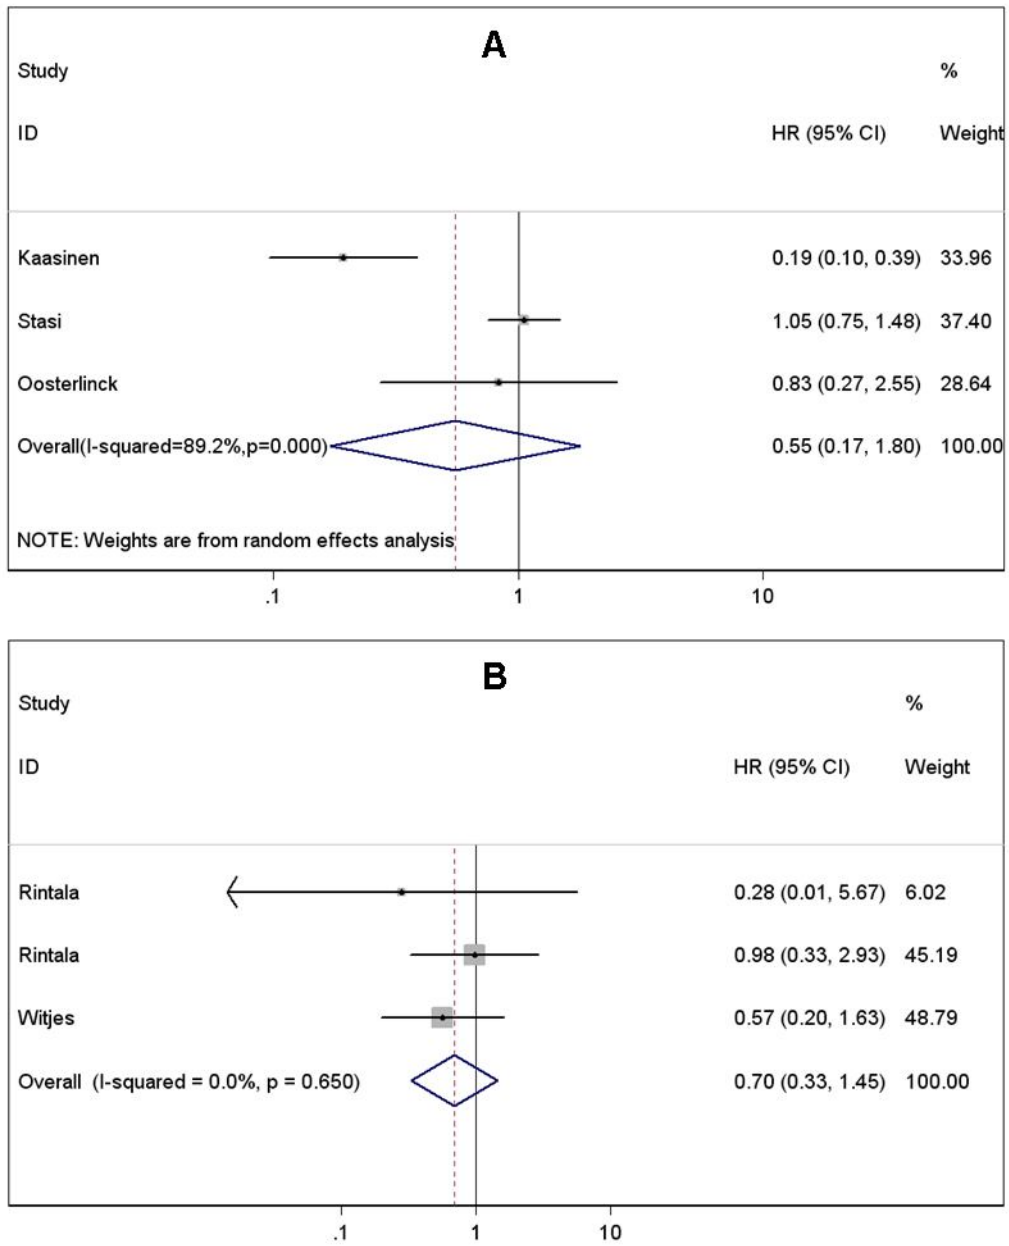

Fig. S2 Summary risk difference of side-effect for various BCG therapy schedules and doses

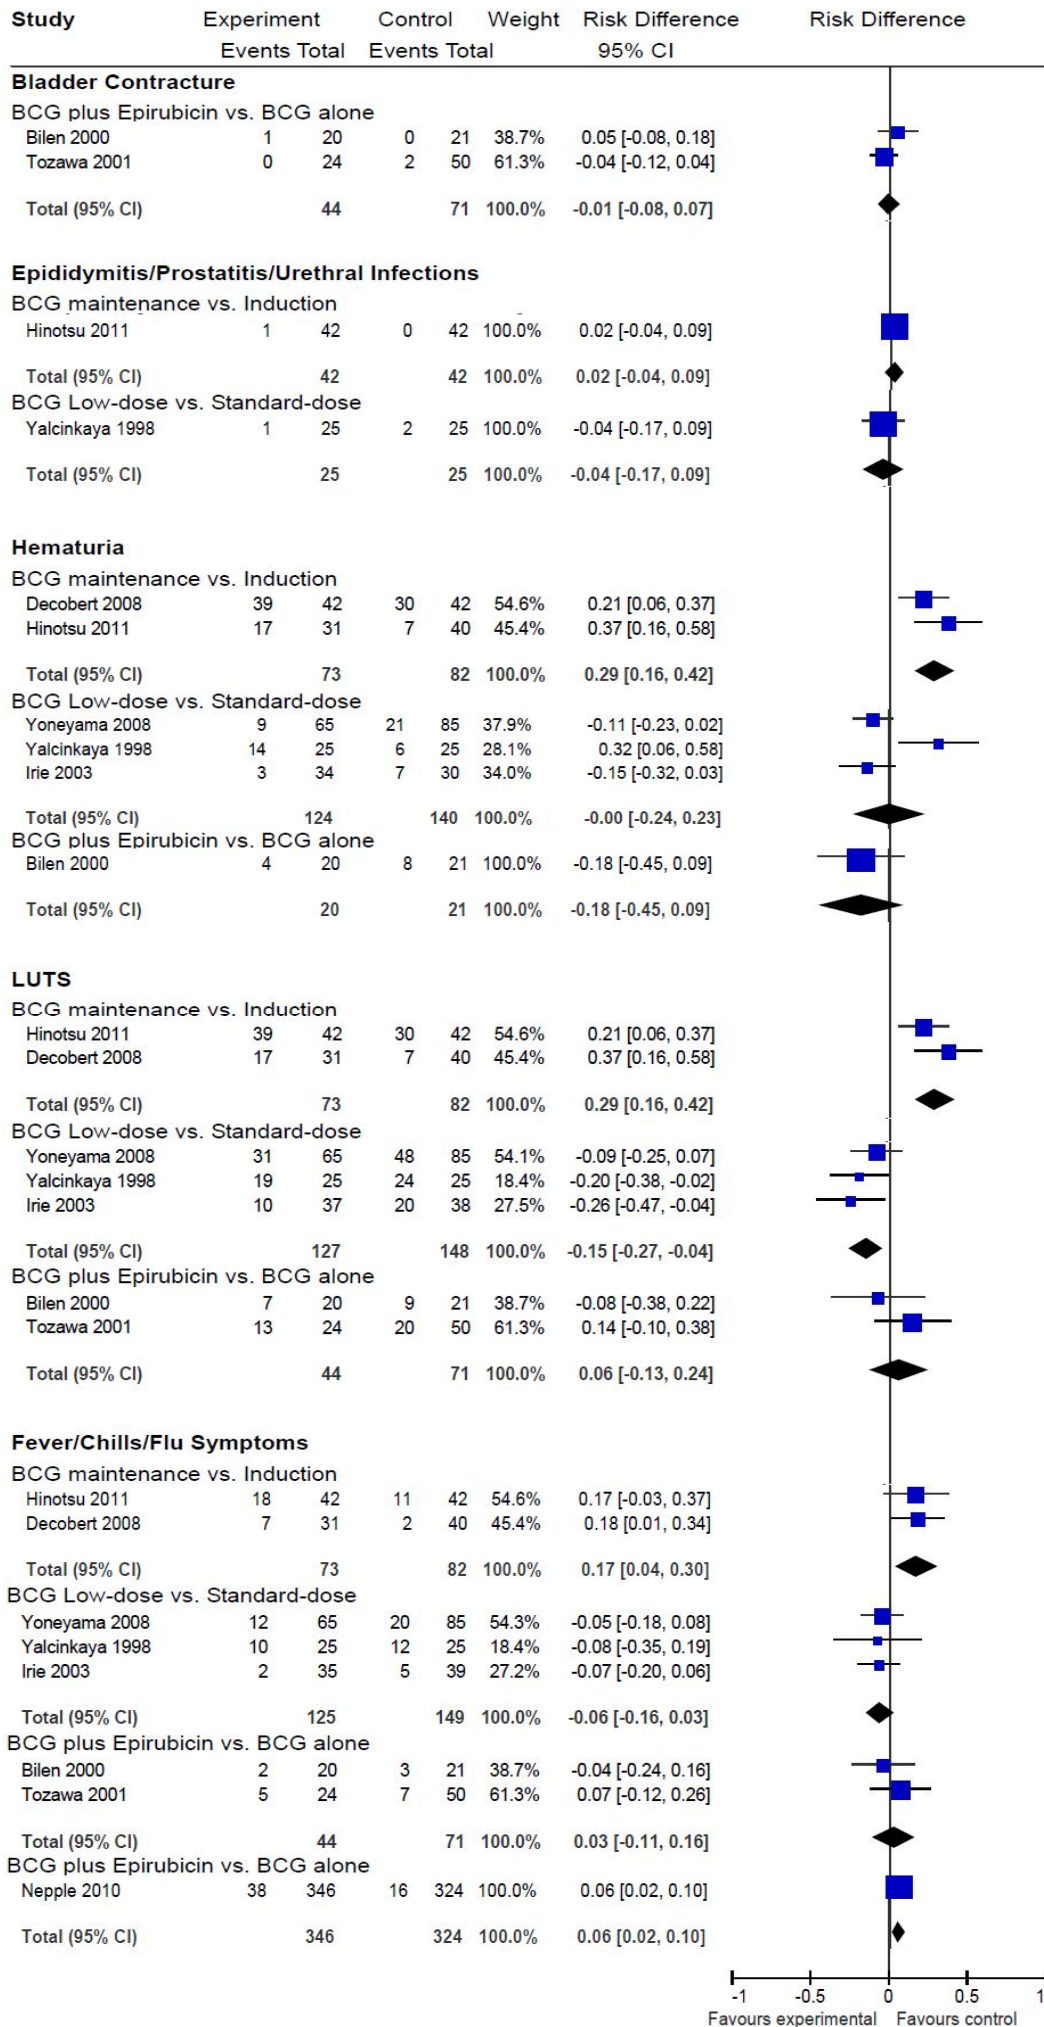

Supplement: 1471-2407-13-332-S1.pdf [file 1471-2407-13-332-S1.pdf]
